# Supplementary material
Source: PubMed Central journal article supplement (PMC11324524)
Supplement: 41587_2023_1948_MOESM4_ESM.pdf [file 41587_2023_1948_MOESM4_ESM.pdf]

# Agarose 2%

2c

M 1 2 3 4 5 6 7 8 9 10

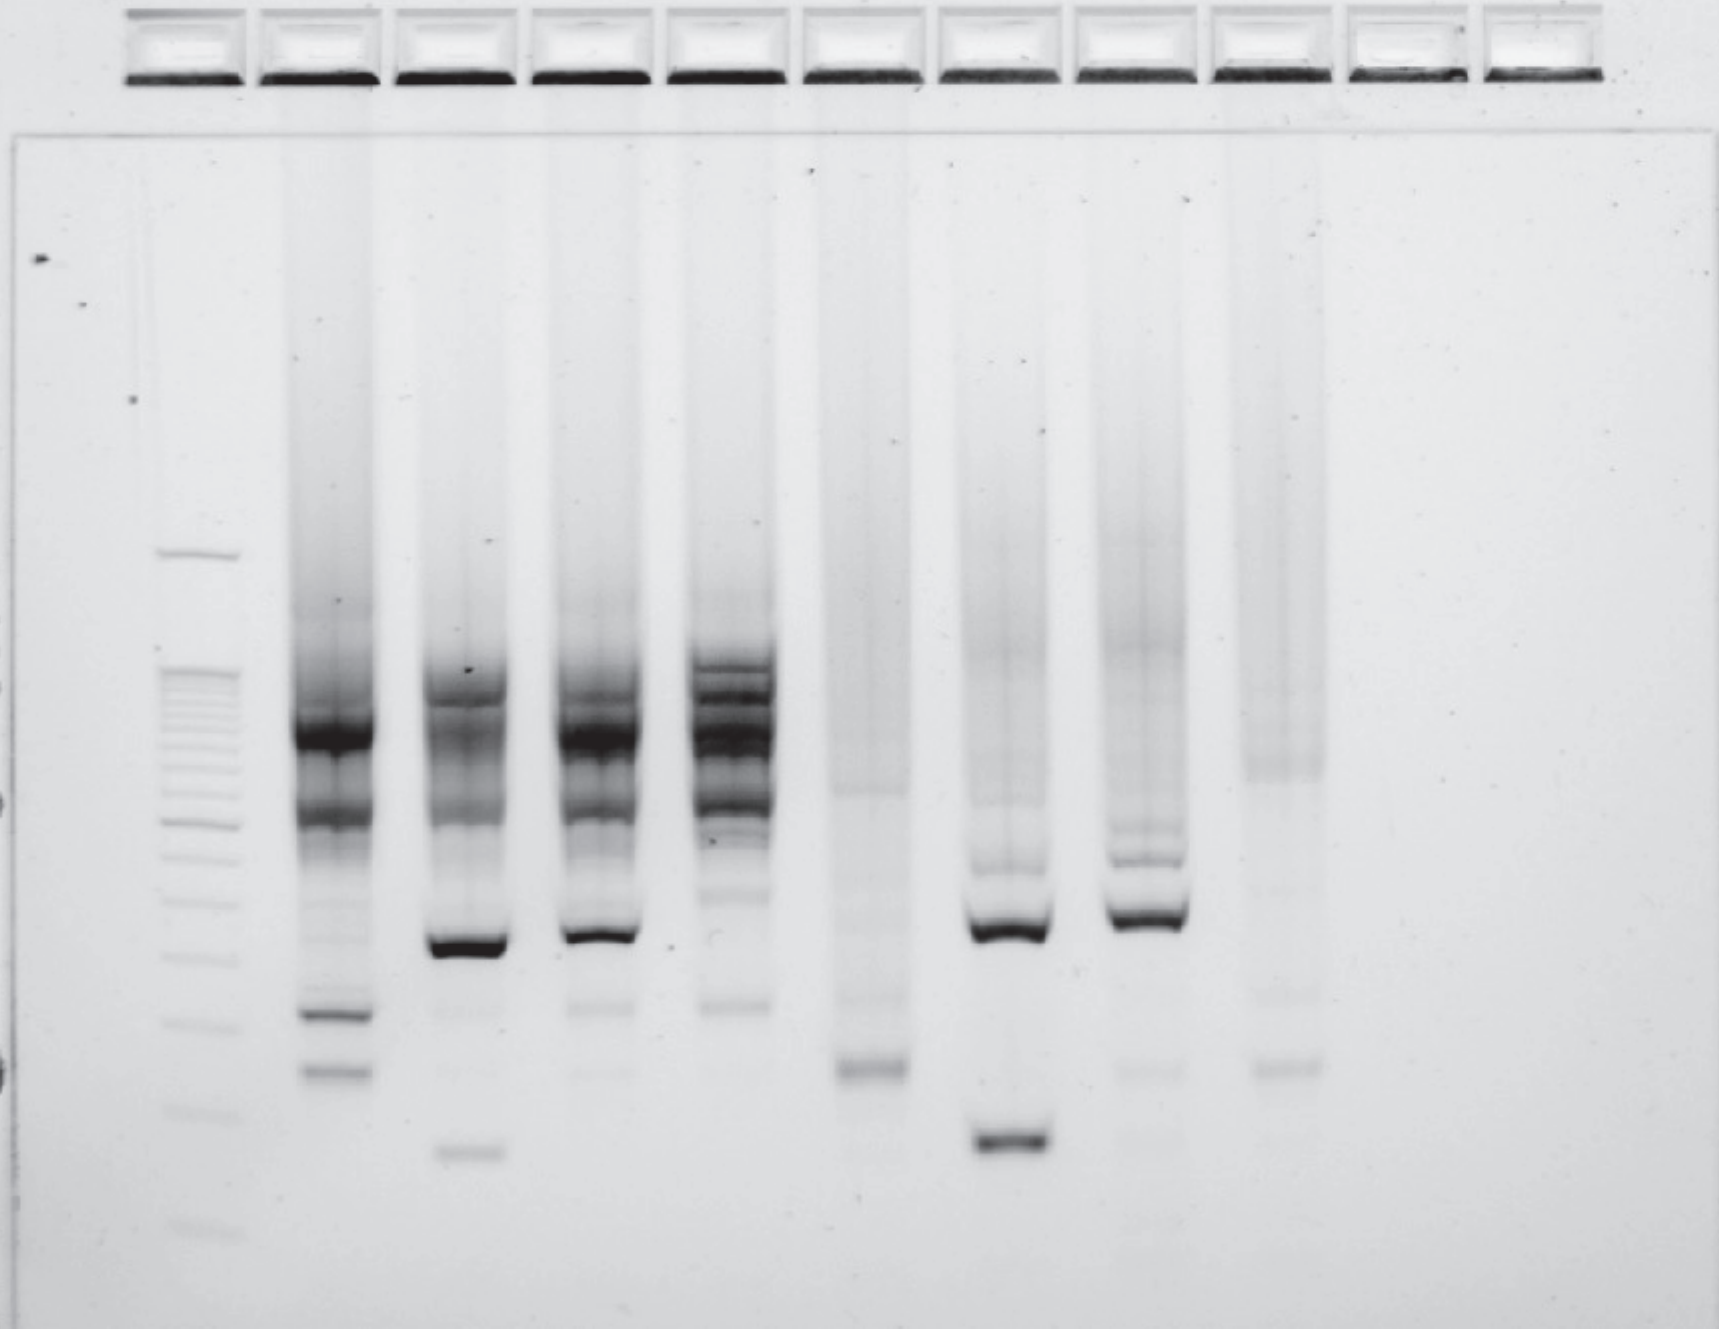

2d-1

# Agarose 2%

M 1 2 3 4 5 6 7 8 9 10

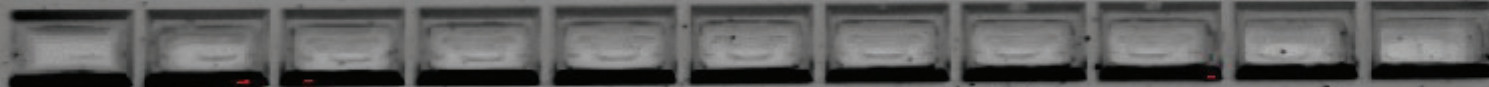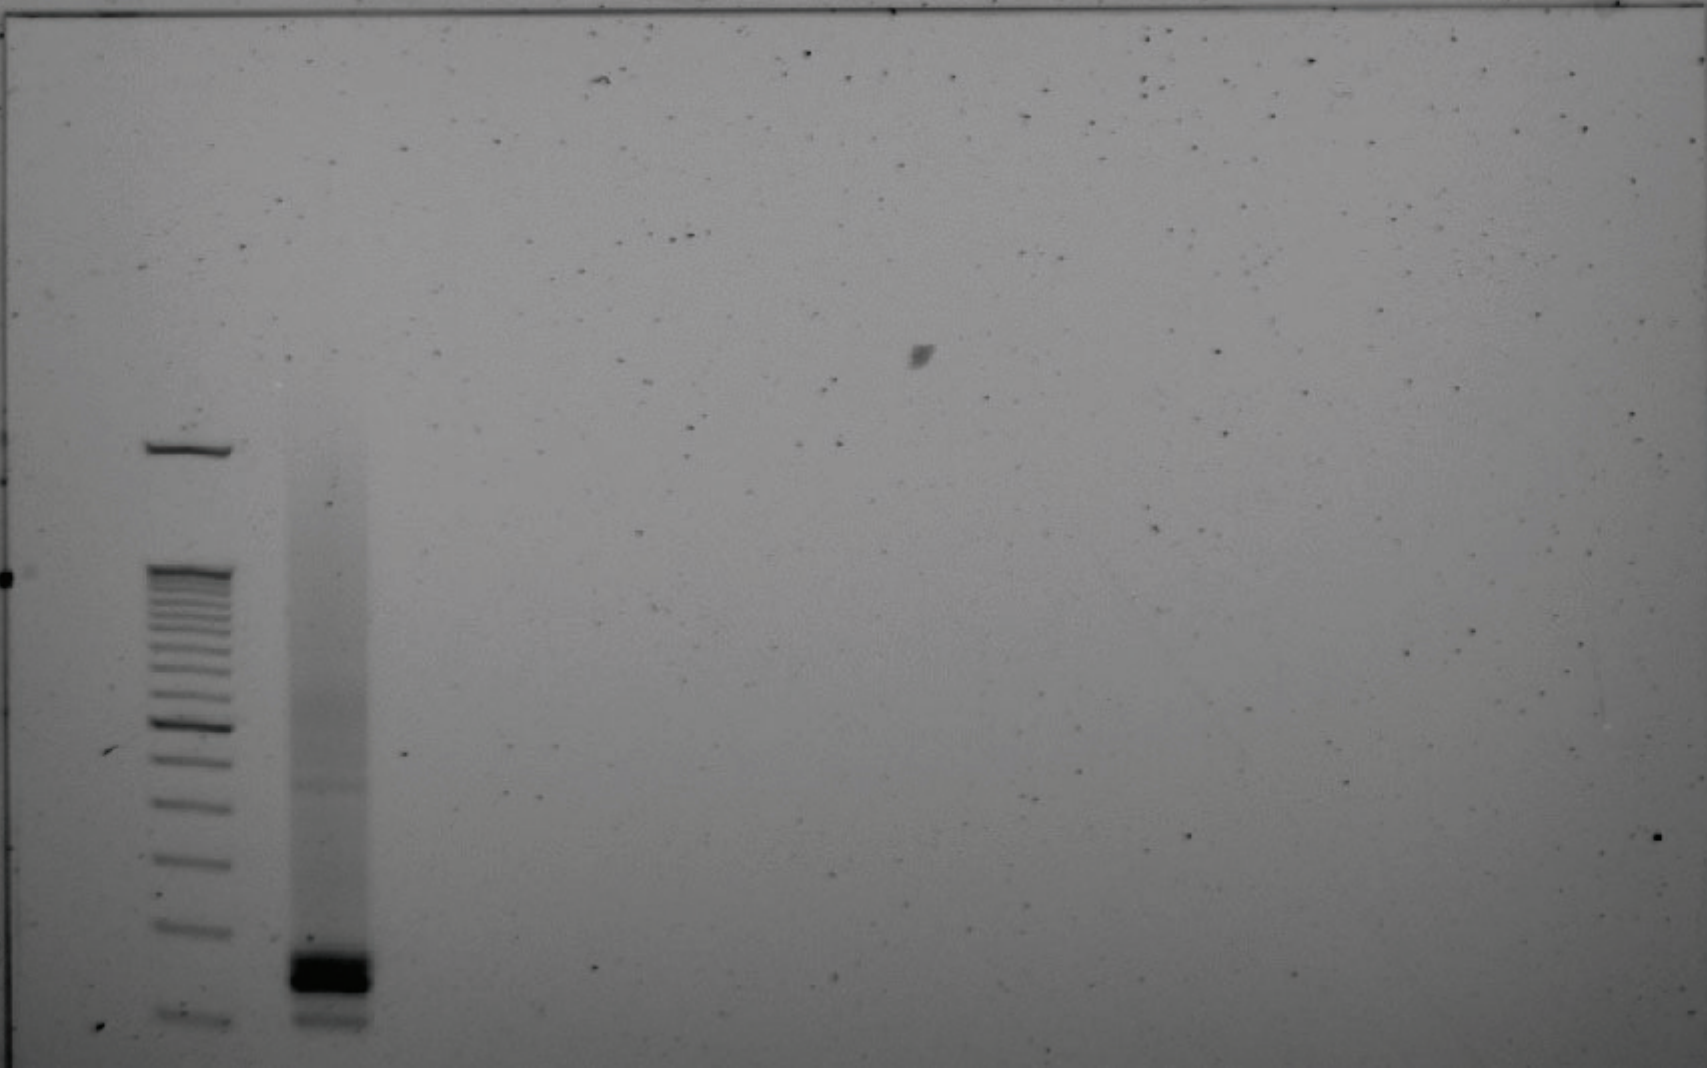

# Agarose 2%

2d-2

M 1 2 3 4 5 6 7 8 9 10

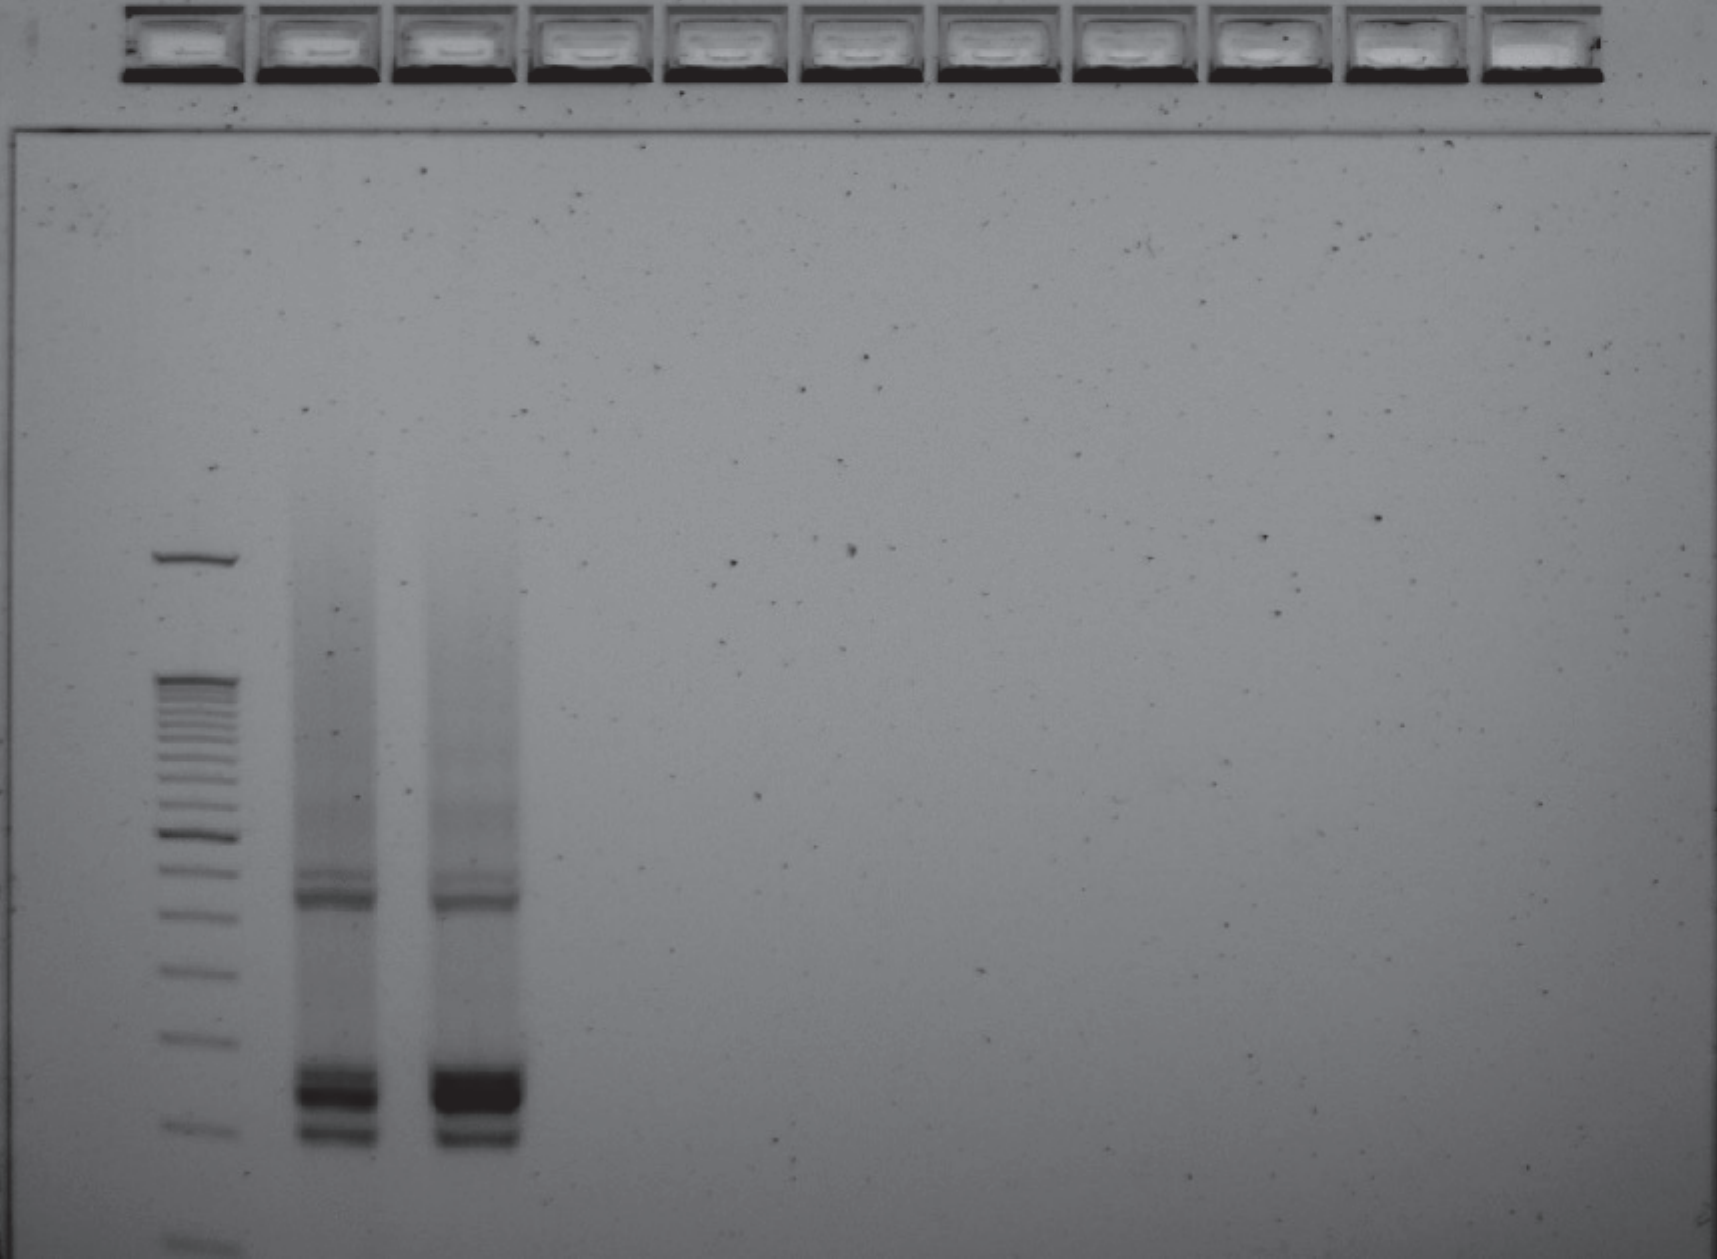

# Agarose 2%

M 1 2 3 4 5 6 7 8 9 10

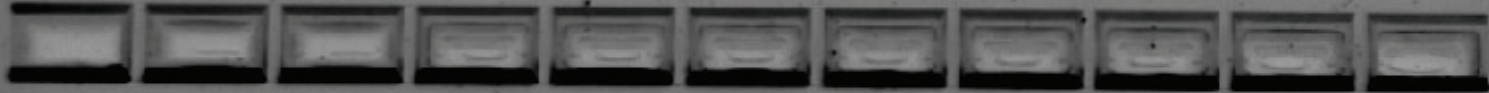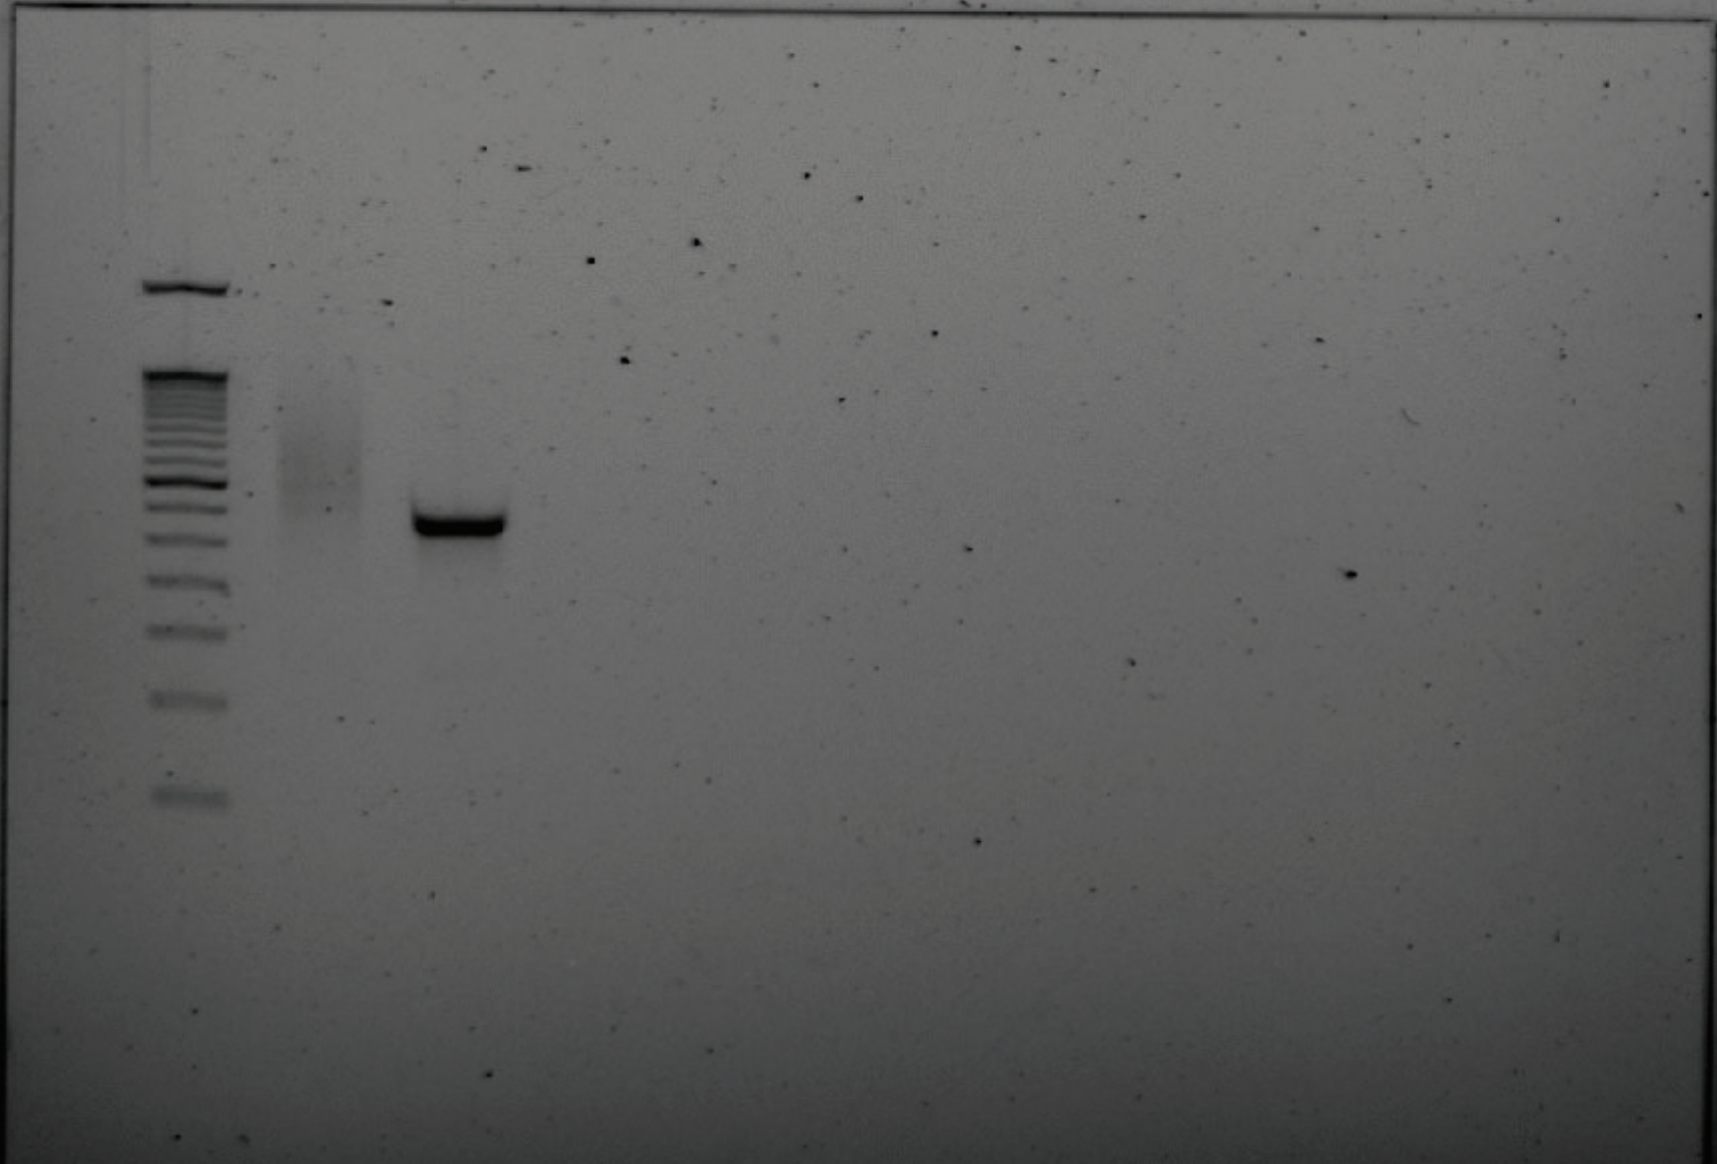

2e
